# Supplementary material for: Short-term Adverse Events After the Third Dose of the BNT162b2 mRNA COVID-19 Vaccine in Adults 60 Years or Older
Source: PubMed Central journal article supplement (PMC9016488; doi:10.1001/jamanetworkopen.2022.7657), 2022-04-18
Supplement: jamanetwopen-e227657-s001.pdf [file jamanetwopen-e227657-s001.pdf]

## Supplemental Online Content

Auster O, Finkel U, Dagan N, et al. Short-term adverse events after the third dose of the BNT162b2 mRNA COVID-19 vaccine in adults 60 years or older. *JAMA Netw Open*. 2022;5(4):e227657. doi:10.1001/jamanetworkopen.2022.7657

### **eTable.** Survey Questionnaire

This supplemental material has been provided by the authors to give readers additional information about their work.

**eTable – Survey questionnaire**

| #  | Question                                                                                                                                                                                                                                                                                                                                                                                                                                                                                                                                                                                                                                                                                                                | Conditions†    |
|----|-------------------------------------------------------------------------------------------------------------------------------------------------------------------------------------------------------------------------------------------------------------------------------------------------------------------------------------------------------------------------------------------------------------------------------------------------------------------------------------------------------------------------------------------------------------------------------------------------------------------------------------------------------------------------------------------------------------------------|----------------|
| Q1 | Did you receive the third dose of the COVID-19 vaccine in the last two weeks?<br><i>(Yes / No)</i>                                                                                                                                                                                                                                                                                                                                                                                                                                                                                                                                                                                                                      |                |
| Q2 | Did you experience any adverse events following the third vaccine dose?<br><i>(Yes / No)</i>                                                                                                                                                                                                                                                                                                                                                                                                                                                                                                                                                                                                                            |                |
| Q3 | Did you have any local reaction in the arm in which the vaccine was injected?<br><i>(Yes / No)</i>                                                                                                                                                                                                                                                                                                                                                                                                                                                                                                                                                                                                                      | Q2 = “yes”     |
| Q4 | Which of the following local reactions did you have in the arm of the injection?<br><i>(Multiple choice)</i><br><br><ul style="list-style-type: none"> <li>- <i>Pain at the injection site</i></li> <li>- <i>Swelling at the injection site</i></li> <li>- <i>Swelling of the armpit, near the injection site</i></li> <li>- <i>Other reaction</i></li> </ul>                                                                                                                                                                                                                                                                                                                                                           | Q2, Q3 = “yes” |
| Q5 | Did you have any local reactions in the rest of the body following the injection of the vaccine?<br><i>(Yes / No)</i>                                                                                                                                                                                                                                                                                                                                                                                                                                                                                                                                                                                                   | Q2 = “yes”     |
| Q6 | Which of the following adverse events in the rest of the body did you experience?<br><i>[Multiple choice]</i><br><br><ul style="list-style-type: none"> <li>- <i>Fatigue</i></li> <li>- <i>Headache</i></li> <li>- <i>Muscle aches</i></li> <li>- <i>Fever up to 38 degrees [Celsius]</i></li> <li>- <i>Fever above 38 degrees [Celsius]</i></li> <li>- <i>Nausea</i></li> <li>- <i>Vomiting or diarrhea</i></li> <li>- <i>Joint aches</i></li> <li>- <i>Generally feeling bad [=malaise]</i></li> <li>- <i>Disseminated rash</i></li> <li>- <i>Rash on the face</i></li> <li>- <i>Chest pains</i></li> <li>- <i>Irregular pulse</i></li> <li>- <i>Difficulty breathing</i></li> <li>- <i>Other reaction</i></li> </ul> | Q2, Q3 = “yes” |
| Q7 | For how many days following the administration of the third vaccine dose did the adverse reactions last?<br><br><ul style="list-style-type: none"> <li>- <i>Up to one day</i></li> <li>- <i>One to two days</i></li> <li>- <i>Two to three days</i></li> <li>- <i>Over three days</i></li> <li>- <i>Cannot recall</i></li> </ul>                                                                                                                                                                                                                                                                                                                                                                                        | Q2 = “yes”     |

|     |                                                                                                                                                                                                                                                                                                                                               |            |
|-----|-----------------------------------------------------------------------------------------------------------------------------------------------------------------------------------------------------------------------------------------------------------------------------------------------------------------------------------------------|------------|
| Q8  | <p>Did you seek medical attention for one or more of the adverse events?</p> <p><i>First survey:</i></p> <p><i>Yes / No</i></p> <p><i>Second survey:</i></p> <ul style="list-style-type: none"> <li>- <i>Yes, at the hospital</i></li> <li>- <i>Yes, community doctor</i></li> <li>- <i>No</i></li> </ul>                                     | Q2 = “yes” |
| Q9  | <p>Several months ago, you received the second dose of the vaccine – did you experience any adverse events following the administration of the second vaccine?</p> <ul style="list-style-type: none"> <li>- <i>Yes</i></li> <li>- <i>No</i></li> <li>- <i>Cannot recall</i></li> </ul>                                                        |            |
| Q10 | <p>How would you summarize your feeling in the days after receiving the third vaccine dose, in comparison to the days after receiving the second vaccine dose?</p> <ul style="list-style-type: none"> <li>- <i>Feel better now</i></li> <li>- <i>Feel similar</i></li> <li>- <i>Feel worse now</i></li> <li>- <i>Cannot recall</i></li> </ul> |            |
|     |                                                                                                                                                                                                                                                                                                                                               |            |
|     |                                                                                                                                                                                                                                                                                                                                               |            |

This survey was translated from Hebrew.

† Only participants who met the condition were asked the relevant question, i.e., only participants who answered “yes” in Q2 were asked Q3.
